# Supplementary material
Source: PubMed Central journal article supplement (PMC4853560)
Supplement: tobaccocontrol-2014-052080-s1.pdf [file tobaccocontrol-2014-052080-s1.pdf]

**Supplemental Table. Adverse events (AEs) at baseline and during the study.\***

| AE                   | Baseline**  |            |              |            | During Study*** |            |              |            | p-value |
|----------------------|-------------|------------|--------------|------------|-----------------|------------|--------------|------------|---------|
|                      | Gum (N=195) |            | Snus (N=196) |            | Gum (N=195)     |            | Snus (N=196) |            |         |
|                      | Mild        | Mod-Severe | Mild         | Mod-Severe | Mild            | Mod-Severe | Mild         | Mod-Severe |         |
| Dry Mouth            | 29          | 4          | 35           | 4          | 40              | 2          | 48           | 7          | 0.138   |
| Excessive Salivation | 2           | 2          | 5            | 4          | 37              | 4          | 57           | 19         | <0.0001 |
| Headache             | 25          | 16         | 25           | 19         | 26              | 6          | 13           | 14         | 0.022   |
| Dizziness            | 11          | 1          | 10           | 2          | 21              | 1          | 23           | 1          | 0.936   |
| Lightheaded          | 11          | 0          | 11           | 1          | 14              | 1          | 20           | 1          | 0.684   |
| Nausea               | 1           | 2          | 2            | 2          | 35              | 8          | 48           | 13         | 0.121   |
| Belching             | 8           | 1          | 9            | 0          | 34              | 3          | 22           | 2          | 0.166   |
| Hiccups              | 13          | 0          | 7            | 0          | 45              | 4          | 38           | 4          | 0.645   |
| Sore Throat          | 13          | 2          | 15           | 0          | 26              | 6          | 34           | 2          | 0.211   |
| Mouth Sores          | 1           | 0          | 3            | 0          | 31              | 1          | 37           | 9          | 0.020   |
| Sleep Disturbance    | 28          | 21         | 31           | 13         | 23              | 12         | 22           | 6          | 0.330   |
| Anxiety              | 43          | 8          | 59           | 8          | 16              | 7          | 18           | 3          | 0.442   |

\*AE was listed if it was reported by >5% of the sample. Because of so few severe AEs, they were combined with moderate severity.

\*\*All reported AE's at baseline, regardless of cause.\*\*\*Maximum severity across the study (each person counted once), among those AEs noted as definitely related, possibly related or unknown cause. Those AEs with cause noted as unrelated were not included.
